# Supplementary material
Source: publisher figshare collection journal article supplement (https://acs.figshare.com/ndownloader/files/9474448)
Supplement: Supplementary file 1 [file 9474448]

# Supporting Information

## **A Flexible and Highly Sensitive Pressure Sensor Based on Microdome-Patterned PDMS Forming with Assistance of Colloid Self-Assembly and Replica Technique for Wearable Electronics**

*Yuan Zhang<sup>†, ‡, ||</sup>, Yougen Hu<sup>†, ||</sup>, Pengli Zhu<sup>†, \*</sup>, Fei Han<sup>†, ‡</sup>, Yu Zhu<sup>†</sup>, Rong Sun<sup>†, \*</sup>, and Ching-Ping Wong<sup>⊥, #</sup>*

<sup>†</sup>Shenzhen Institutes of Advanced Technology, Chinese Academy of Sciences, Shenzhen 518055, China.

<sup>‡</sup>Department of Nano Science and Technology Institute, University of Science and Technology of China, Suzhou 215123, China.

<sup>⊥</sup>Department of Electronics Engineering, The Chinese University of Hong Kong, Hong Kong 999077, China.

<sup>#</sup> School of Materials Science and Engineering, Georgia Institute of Technology, Atlanta, Georgia 30332, United States.

<sup>\*</sup>Address corresponding to: pl.zhu@siat.ac.cn; rong.sun@siat.ac.cn

<sup>||</sup>These authors contributed equally to this work.

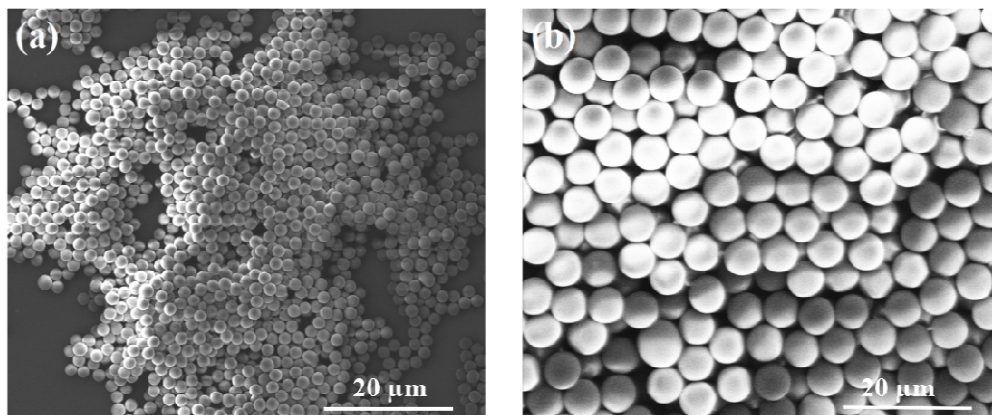

**Figure S1.** (a) SEM image of PS beads with 2  $\mu\text{m}$  diameter. (b) SEM image of PS beads with 5.6  $\mu\text{m}$  diameter.

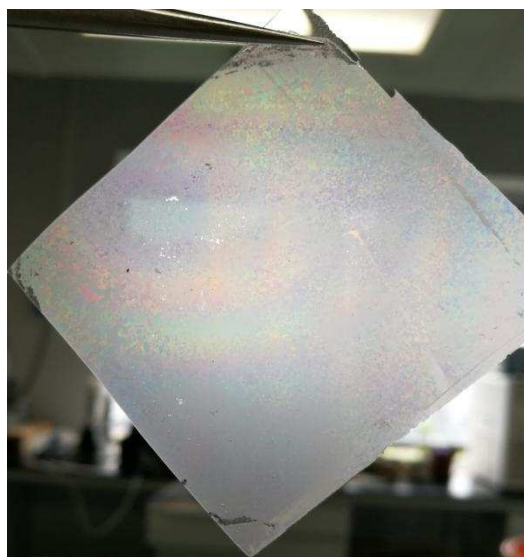

**Figure S2.** The photograph of the concave PDMS film, showing the optical characteristics.

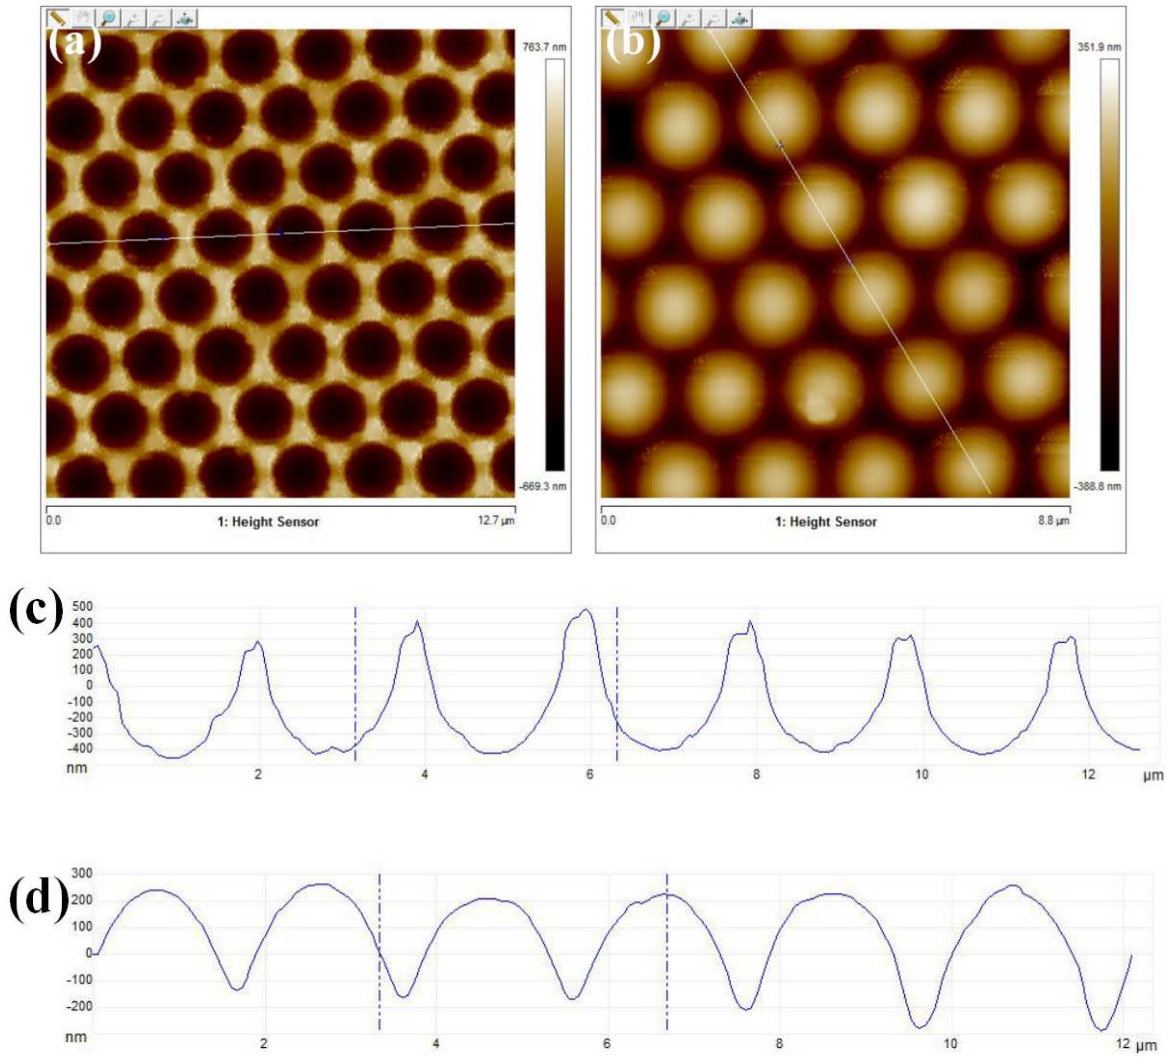

**Figure S3.** (a) The 2D SPM image at the bottom of the concave PDMS film based on 2  $\mu\text{m}$ -PS microspheres. (b) The 2D SPM image at the top of the microdome PDMS film based on 2  $\mu\text{m}$ -PS microspheres. (c) The 2D line profile at the bottom of the concave PDMS film based on 2  $\mu\text{m}$ -PS microspheres. (d) The 2D line profile at the top of the microdome PDMS film based on 2  $\mu\text{m}$ -PS microspheres.

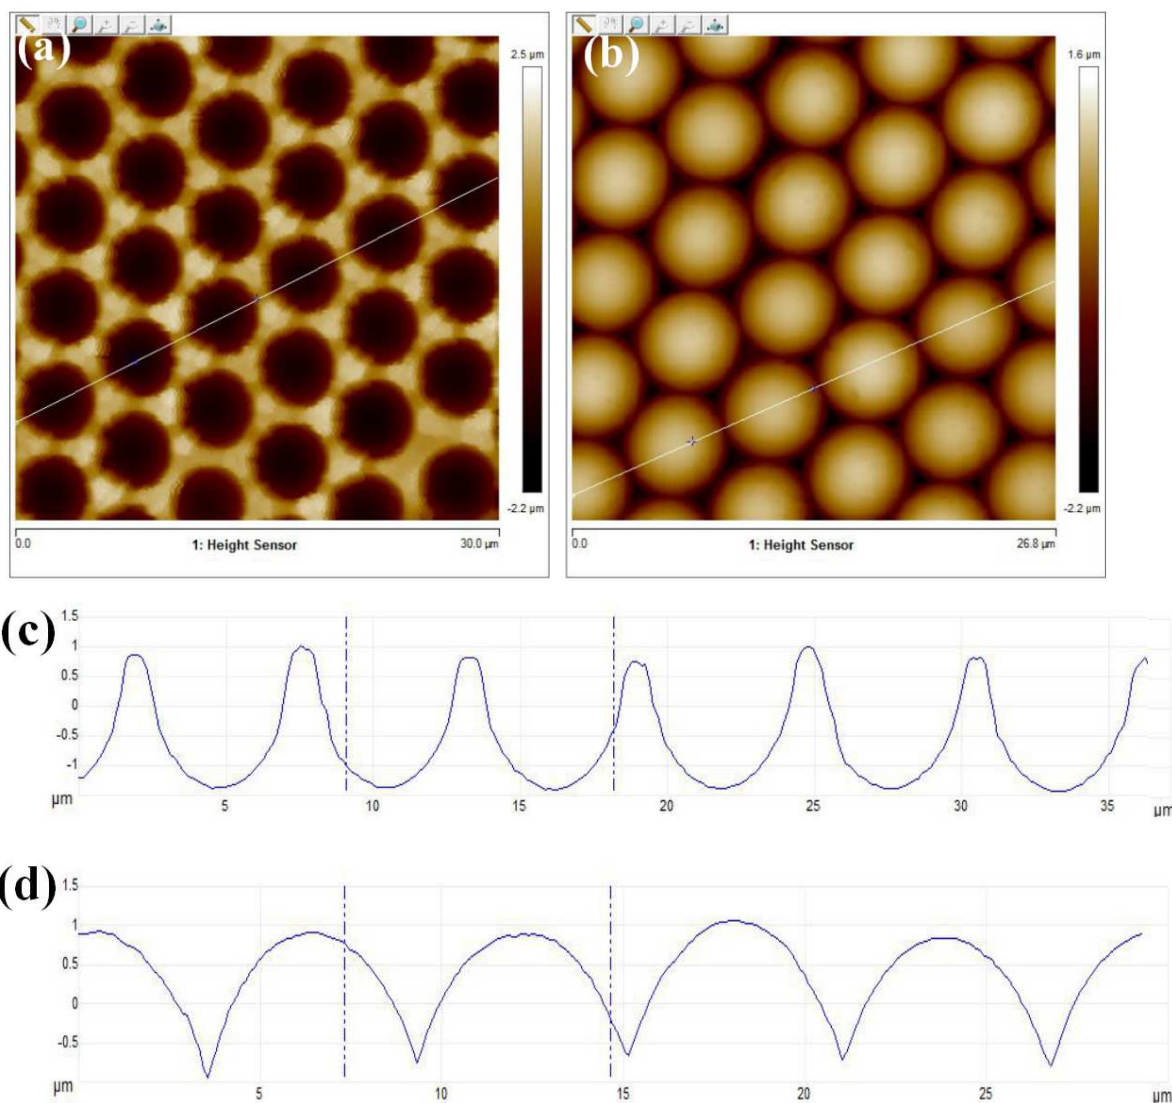

**Figure S4.** (a) The 2D SPM image at the bottom of the concave PDMS film based on 5.6  $\mu\text{m}$ -PS microspheres. (b) The 2D SPM image at the top of the microdome PDMS film based on 5.6  $\mu\text{m}$ -PS microspheres. (c) The 2D line profile at the bottom of the concave PDMS film based on 5.6  $\mu\text{m}$ -PS microspheres. (d) The 2D line profile at the top of the microdome PDMS film based on 5.6  $\mu\text{m}$ -PS microspheres.

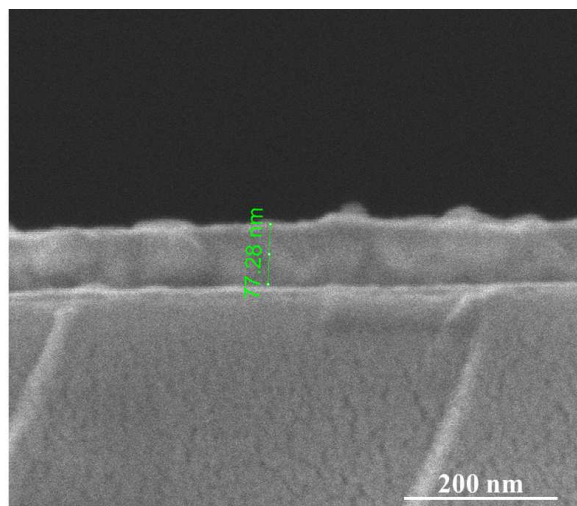

**Figure S5.** Cross-sectional SEM image of gold layer sputtered on PDMS surface.

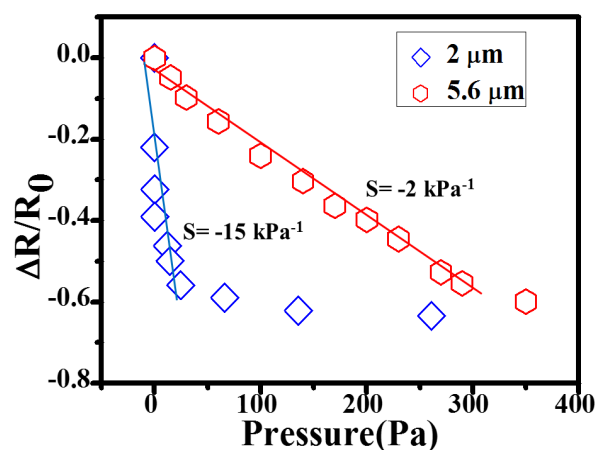

**Figure S6.** Sensitivity of different pressure sensors based on 2 μm and 5.6 μm sized PS sphere in low-range pressure.

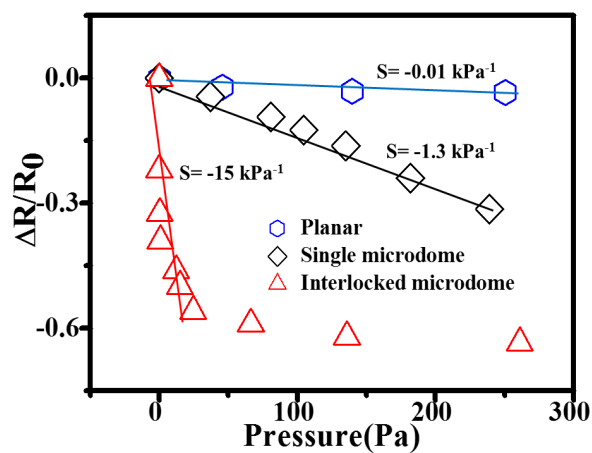

**Figure S7.** Sensitivity of different pressure sensors based on the planar film, single microdome film, and the interlocked microdome film in low-range pressure.

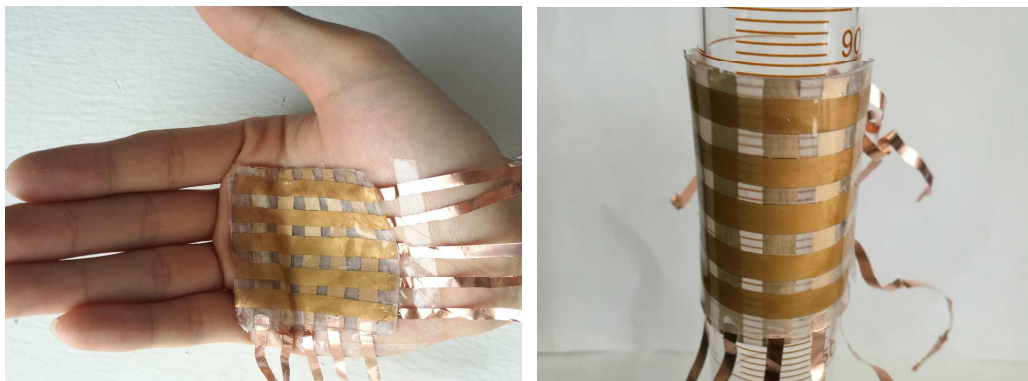

**Figure S8.** Photographs of the flexible pressure sensor array attached on human palm and graduated cylinder.
